# Supplementary material for: An observational study reveals that neonatal vitamin D is primarily determined by maternal contributions: implications of a new assay on the roles of vitamin D forms
Source: Springer Nature journal article supplement (doi:10.1186/1475-2891-12-77), 2013-06-07
Supplement: 12937_2012_650_MOESM1_ESM.pdf [file 12937_2012_650_MOESM1_ESM.pdf]

**Additional file 1.** Descriptive statistics for the primary forms, active forms and epimers of maternal and neonatal 25(OH)D<sub>2</sub> and 25(OH)D<sub>3</sub>.

|                 | <b>Vitamin D form</b>                          | <b>N</b> | <b>Minimum<sup>a</sup></b> | <b>Maximum</b> | <b>Mean<sup>b</sup></b> | <b>SD<sup>b</sup></b> | <b>Mean SEM<sup>c</sup></b> |
|-----------------|------------------------------------------------|----------|----------------------------|----------------|-------------------------|-----------------------|-----------------------------|
| <b>Maternal</b> | D <sub>2</sub>                                 | 60       | 0.25(3.3%)                 | 73.70          | 8.64(8.94)              | 10.24(10.29)          | 0.18                        |
|                 | D <sub>3</sub>                                 | 60       | 0.43(48.3%)                | 62.25          | 4.45(8.60)              | 10.27(13.05)          | 0.09                        |
|                 | 25(OH)D <sub>2</sub>                           | 60       | 1.20(16.7%)                | 27.12          | 4.06(4.87)              | 4.86(4.95)            | 0.09                        |
|                 | 25(OH)D <sub>3</sub>                           | 60       | 1.22(3.3%)                 | 50.50          | 13.84(14.32)            | 11.57(11.48)          | 0.27                        |
|                 | 3-epi-25(OH)D <sub>2</sub>                     | 60       | 0.07(26.7%)                | 23.30          | 1.99(2.72)              | 3.55(3.91)            | 0.09                        |
|                 | 3-epi-25(OH)D <sub>3</sub>                     | 60       | 0.00(16.7%)                | 28.05          | 2.82(3.38)              | 4.51(4.74)            | 0.09                        |
|                 | 1 $\alpha$ ,25(OH) <sub>2</sub> D <sub>2</sub> | 60       |                            |                | BLQ (100%)              |                       |                             |
|                 | 1 $\alpha$ ,25(OH) <sub>2</sub> D <sub>3</sub> | 60       | 0.04(0.0%)                 | 0.49           | 0.06                    | 0.06                  | 0.00                        |
| <b>Neonatal</b> | D <sub>2</sub>                                 | 60       | 1.25(3.3%)                 | 35.90          | 9.78(10.12)             | 8.32(8.26)            | 0.49                        |
|                 | D <sub>3</sub>                                 | 60       | 1.81(40.0%)                | 62.73          | 5.27(8.79)              | 10.18(11.95)          | 0.25                        |
|                 | 25(OH)D <sub>2</sub>                           | 60       | 0.23(16.7%)                | 10.35          | 2.84(3.41)              | 2.67(2.56)            | 0.11                        |
|                 | 25(OH)D <sub>3</sub>                           | 60       | 0.31(6.7%)                 | 70.95          | 13.03(13.97)            | 12.55(12.48)          | 0.28                        |
|                 | 3-epi-25(OH)D <sub>2</sub>                     | 60       | 0.18(36.7%)                | 8.75           | 1.54(2.44)              | 2.01v(2.05)           | 0.08                        |
|                 | 3-epi-25(OH)D <sub>3</sub>                     | 60       | 0.20(16.7%)                | 19.28          | 2.98(3.57)              | 3.68(3.76)            | 0.12                        |
|                 | 1 $\alpha$ ,25(OH) <sub>2</sub> D <sub>2</sub> | 60       |                            |                | BLQ (100%)              |                       |                             |
|                 | 1 $\alpha$ ,25(OH) <sub>2</sub> D <sub>3</sub> | 60       |                            |                | BLQ (100%)              |                       |                             |

BLQ: below the limit of quantification, SD: standard deviation, SEM: standard error of measurement. All values are expressed in ng/mL.

<sup>a</sup> Based on concentrations above BLQ. Percentages with concentrations BLQ for each analyte are in brackets.

<sup>b</sup> Using a conservative approach, means and SDs are calculated with 0 imputed for BLQ. Means and SDs based purely on concentrations  $\geq$  BLQ are provided in brackets.

<sup>c</sup> Based on two measurements.
