# Supplementary material for: An observational study reveals that neonatal vitamin D is primarily determined by maternal contributions: implications of a new assay on the roles of vitamin D forms
Source: Springer Nature journal article supplement (doi:10.1186/1475-2891-12-77), 2013-06-07
Supplement: 12937_2012_650_MOESM2_ESM.pdf [file 12937_2012_650_MOESM2_ESM.pdf]

**Additional file 2.** Correlation matrix (Pearson's r) for the model predicting neonatal 25(OH)D.

|                                                |                            | Maternal |              |        |           |                  |        |        |        |                      |                      |                            |                            |                                                | Neonatal 25(OH)D |  |
|------------------------------------------------|----------------------------|----------|--------------|--------|-----------|------------------|--------|--------|--------|----------------------|----------------------|----------------------------|----------------------------|------------------------------------------------|------------------|--|
|                                                |                            | Age      | Adjusted BMI | UVB    | Ca intake | Vitamin D intake | PTH    | Ca     | P      | 25(OH)D <sub>2</sub> | 25(OH)D <sub>3</sub> | 3-epi-25(OH)D <sub>2</sub> | 3-epi-25(OH)D <sub>3</sub> | 1 $\alpha$ ,25(OH) <sub>2</sub> D <sub>3</sub> |                  |  |
| Maternal                                       | Age                        | 1.000    |              |        |           |                  |        |        |        |                      |                      |                            |                            |                                                |                  |  |
|                                                | Adjusted BMI               | 0.122    | 1.000        |        |           |                  |        |        |        |                      |                      |                            |                            |                                                |                  |  |
|                                                | UVB                        | -0.304   | -0.072       | 1.000  |           |                  |        |        |        |                      |                      |                            |                            |                                                |                  |  |
|                                                | Ca intake                  | -0.244   | 0.261        | 0.378  | 1.000     |                  |        |        |        |                      |                      |                            |                            |                                                |                  |  |
|                                                | Vitamin D intake           | -0.093   | 0.096        | 0.349  | 0.369     | 1.000            |        |        |        |                      |                      |                            |                            |                                                |                  |  |
|                                                | PTH                        | -0.142   | 0.315        | 0.039  | -0.007    | -0.011           | 1.000  |        |        |                      |                      |                            |                            |                                                |                  |  |
|                                                | Ca                         | 0.148    | -0.004       | -0.136 | -0.145    | -0.086           | 0.081  | 1.000  |        |                      |                      |                            |                            |                                                |                  |  |
|                                                | P                          | 0.080    | 0.124        | -0.076 | -0.092    | 0.024            | 0.013  | 0.571  | 1.000  |                      |                      |                            |                            |                                                |                  |  |
|                                                | 25(OH)D <sub>2</sub>       | 0.047    | 0.032        | 0.040  | 0.112     | 0.421            | 0.056  | 0.097  | 0.243  | 1.000                |                      |                            |                            |                                                |                  |  |
|                                                | 25(OH)D <sub>3</sub>       | 0.325    | 0.046        | -0.067 | 0.055     | 0.037            | -0.047 | 0.107  | 0.140  | 0.158                | 1.000                |                            |                            |                                                |                  |  |
|                                                | 3-epi-25(OH)D <sub>2</sub> | 0.232    | 0.009        | -0.301 | -0.019    | -0.136           | -0.025 | 0.068  | 0.134  | 0.234                | 0.434                | 1.000                      |                            |                                                |                  |  |
|                                                | 3-epi-25(OH)D <sub>3</sub> | 0.256    | 0.070        | -0.275 | 0.014     | -0.108           | -0.063 | -0.099 | 0.109  | 0.265                | 0.510                | 0.858                      | 1.000                      |                                                |                  |  |
| 1 $\alpha$ ,25(OH) <sub>2</sub> D <sub>3</sub> | 0.018                      | -0.023   | -0.137       | -0.066 | -0.073    | -0.040           | 0.006  | -0.048 | -0.087 | -0.011               | -0.077               | 0.020                      | 1.000                      |                                                |                  |  |
| Neonatal 25(OH)D                               | -0.038                     | -0.003   | -0.156       | 0.108  | 0.180     | 0.053            | -0.005 | 0.038  | 0.439  | 0.437                | 0.505                | 0.584                      | 0.000                      | 1.000                                          |                  |  |

BMI: body mass index, Ca: calcium, P: phosphorus, PTH: parathyroid hormone, UVB: ultraviolet B.
